# Supplementary material for: Smart surfaces based on thermo-responsive polymer brushes prepared from l-alanine derivatives for cell capture and release
Source: Royal Society of Chemistry journal article supplement (doi:10.1039/c5sm01661d), 2015-01-01
Supplement: c5sm01661d1.pdf [file c5sm01661d1.pdf]

Supporting Information for Manuscript Entitled with  
**Smart surfaces based on thermo-responsive polymer brushes prepared  
from L-alanine derivatives for cell capture and release**

Yong Shen<sup>b</sup>, Guannan Li<sup>b</sup>, Yinan Ma<sup>b</sup>, Deyang Yu<sup>b</sup>, Jing Sun<sup>a,\*</sup>,  
and Zhibo Li<sup>a,b,\*</sup>

<sup>a</sup>School of Polymer Science and Engineering, Qingdao University of Science and Technology, Qingdao 266042, China.

<sup>b</sup>Beijing National Laboratory for Molecular Sciences (BNLMS), Institute of Chemistry, Chinese Academy of Sciences, Beijing 100190, China.

E-mail: jingsun@qust.edu.cn, zbli@qust.edu.cn

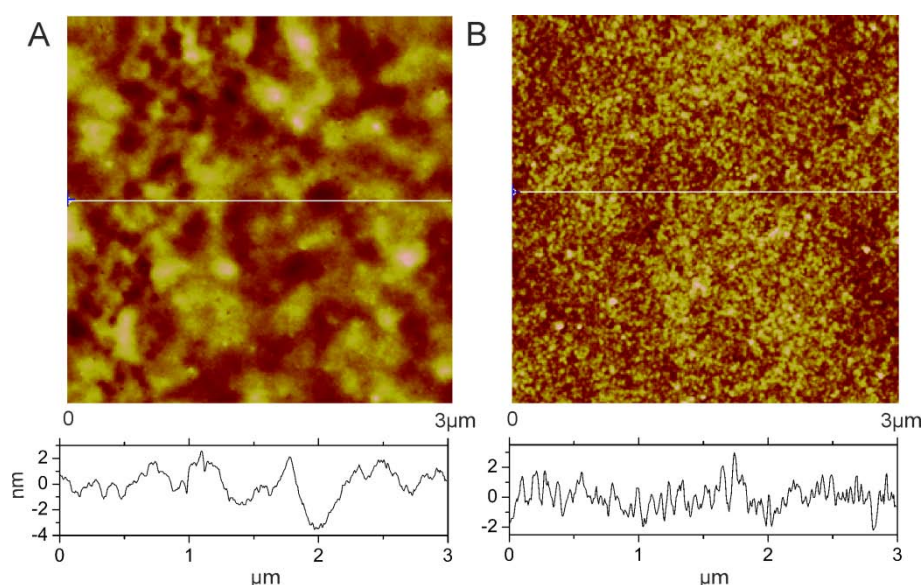

**Figure S1.** AFM topography scans as well as cross sectional profiles of a poly(MA-L-Ala-OMe) brush (A, thickness = 30 nm) and a poly(MA-L-Ala-iPA) brush (B, thickness = 10 nm). The average root mean square (RMS) roughness calculated for poly(MA-L-Ala-OMe) and poly(MA-L-Ala-iPA) brushes is  $2.0 \pm 1.3$  nm and  $0.76 \pm 0.02$  nm, respectively (5 images were counted for each). The difference of RMS roughness between both brushes can be attributed to the difference in the thickness of the films.<sup>1</sup>

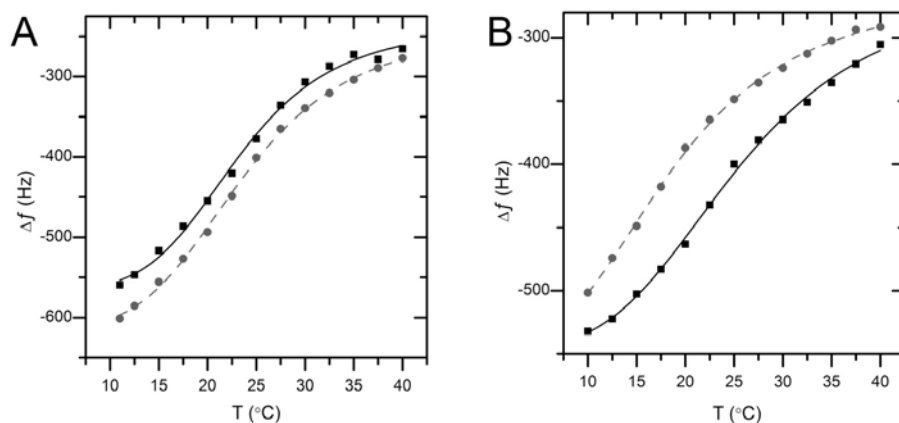

**Figure S2.** Temperature dependence of the third overtone of the frequency shift ( $\Delta f$ ) for (A): a poly(MA-L-Ala-OMe) brush and (B) a poly(MA-L-Ala-iPA) brush as measured by QCM-D in water in a heating (■) and cooling (●) cycle.

**Table S1.** Elemental compositions of ATRP initiator, poly(MA-L-Ala-OMe) brush and poly(MA-L-Ala-iPA) brush modified substrates.

| Sample             | Elemental compositions (%) <sup>a</sup> |       |       |       |      |
|--------------------|-----------------------------------------|-------|-------|-------|------|
|                    | C                                       | N     | O     | Si    | Br   |
| ATRP initiator     | 14.47                                   | 1.57  | 42.91 | 40.42 | 0.63 |
| poly(MA-L-Ala-OMe) | 66.71                                   | 9.08  | 24.22 | 0     | 0    |
| poly(MA-L-Ala-iPA) | 66.52                                   | 12.64 | 15.21 | 5.63  | 0    |

<sup>a</sup> The elemental compositions were given as molar percentage.

**Table S2.** Water contact angles of poly(MA-L-Ala-OMe) (thickness = 25 nm) and poly(MA-L-Ala-iPA) (thickness = 17 nm) brushes measured at different temperatures.

| Sample             | Water contact angle (°) |            |
|--------------------|-------------------------|------------|
|                    | R.T. <sup>a</sup>       | 50 °C      |
| poly(MA-L-Ala-OMe) | 57.2 ± 2.3              | 64.5 ± 2.1 |
| poly(MA-L-Ala-iPA) | 54.3 ± 2.6              | 56.6 ± 0.5 |

<sup>a</sup> Room temperature is around 22 °C.

#### References:

1. S.Q. Wang and Y.X. Zhu. Langmuir, 2009, 25, 13448-13455.
